# Supplementary material for: An ERAD‐independent role for rhomboid pseudoprotease Dfm1 in mediating sphingolipid homeostasis
Source: PubMed Central journal article supplement (PMC9929635; doi:10.15252/embj.2022112275), 2022-11-09
Supplement: EMBJ-42-e112275-s001.pdf [file EMBJ-42-e112275-s001.pdf]

**Appendix Tables S1-S3 for An ERAD-independent role for rhomboid pseudoprotease Dfm1 in mediating sphingolipid homeostasis**

**Appendix Table S1-related to Methods:** Plasmids used in this study, pg. 2-3

**Appendix Table S2-related to Methods:** Yeast strains used in this study, pg. 4-8

**Appendix Table-S3-related to Methods:** Reagents used in this study, pg. 9-10

**Appendix Table S1. Plasmids used in this study, Related to Methods**

| Plasmid | Gene    |               |                                |
|---------|---------|---------------|--------------------------------|
| pSN184  | YIp     | ADE2/<br>URA3 | pTDH3-HMG2-GFP                 |
| pSN149  | 2 $\mu$ | URA3          | pGAL- BIRA-3xFLAG              |
| pSN148  | 2 $\mu$ | URA3          | pGAL-DFM1-BIRA-3xFLAG          |
| pSN246  | YCp     | URA3          | pORM2-RFP                      |
| pSN247  | YCp     | LEU2          | pLCB1-RFP                      |
| pSN266  | YCp     | URA3          | pORM2-GFP                      |
| pSN267  | YCp     | URA3          | pORM2-3D-GFP                   |
| pSN268  | YCp     | URA3          | pORM2-3A-GFP                   |
| pSN60   | YCp     | LEU2          | pDFM1-L64V                     |
| pSN90   | YCp     | LEU2          | pDFM1                          |
| pSN93   | YCp     | LEU2          | pDFM1-K67E                     |
| pSN230  | YCp     | LEU2          | pDFM1-R98L, S99A, S100A, Q101L |
| pSN95   | YCp     | LEU2          | pDFM1-F58S                     |
| pSN162  | YCp     | LEU2          | pDFM1-5Ashp-3HA                |
| pSN161  | YCp     | LEU2          | pDER1-SHP-3HA                  |
| pSN164  | YCp     | LEU2          | pDFM1-AR-3HA                   |
| pSN163  | YCp     | LEU2          | pDFM1-Ax <sub>3</sub> G-3HA    |
| pSN269  | YCp     | TRP1          | pORM2-RFP                      |

|        |               |               |
|--------|---------------|---------------|
| pSN261 | YCp TRP1      | CHS5-mCherry  |
| pSN258 | YCp LEU2/HIS3 | SEC61-mCherry |
| pSN252 | YCp URA3      | HDEL-GFP      |

**Appendix Table S2. Yeast strains used in this study, Related to Methods**

| <b>Strain</b> | <b>Genotype</b>                                                                                          | <b>Reference</b> |
|---------------|----------------------------------------------------------------------------------------------------------|------------------|
| SEN 1         | <i>Mata ade2-101 met2 lys-801 ura3-52 trp1::hisG leu2 his3Δ200</i>                                       | This study       |
| BY4741        | <i>Mata met15Δ0 his3Δ1 leu2Δ0 ura3Δ0</i>                                                                 | This study       |
| SEN 322       | <i>SEN1 2μ::URA3::GAL1pr-Dfm1-BIRA-FLAG</i>                                                              | This study       |
| SEN 324       | <i>SEN1 2μ::URA3::GAL1pr- BIRA-FLAG</i>                                                                  | This study       |
| SEN 167       | <i>SEN1 dfm1Δ::KanMX<br/>ade2-101::ADE2::URA3::TDH3pr-HMG2-GFP<br/>2μ::URA3::GAL1pr-Dfm1-BIRA-3xFLAG</i> | This study       |
| SEN 168       | <i>SEN1 dfm1Δ::KanMX<br/>ade2-101::ADE2::URA3::TDH3pr- HMG2-GFP<br/>2μ::URA3::GAL1pr-BIRA-3xFLAG</i>     | This study       |
| SEN 169       | <i>SEN1 dfm1Δ::KanMX<br/>ade2-101::ADE2::URA3::TDH3pr- HMG2-GFP 2μ::URA3</i>                             | This study       |
| SEN 280       | <i>BY4741 DFM1::DFM1-GFP::HIS</i>                                                                        | This study       |
| SEN 439       | <i>BY4741 DFM1::DFM1-GFP::HIS<br/>CEN::URA3:: prORM2-RFP</i>                                             | This study       |
| SEN 438       | <i>BY4741 DFM1::DFM1-GFP::HIS<br/>CEN::LEU2:: prLCB1-RFP</i>                                             | This study       |
| SEN 635       | <i>SEN1 dfm1Δ::KanMX</i>                                                                                 | This study       |
| SEN 637       | <i>SEN1 tsc3Δ::NatR</i>                                                                                  | This study       |
| SEN 638       | <i>SEN1 dfm1Δ::KanMX tsc3Δ::NatR</i>                                                                     | This study       |
| SEN 640       | <i>SEN1 orm1Δ::KanMX</i>                                                                                 | This study       |
| SEN 641       | <i>SEN1 orm1Δ::KanMX tsc3Δ::NatR</i>                                                                     | This study       |
| SEN 644       | <i>SEN1 orm2Δ::KanMX</i>                                                                                 | This study       |
| RHY 646       | <i>SEN1 orm2Δ::KanMX tsc3Δ::NatR</i>                                                                     | This study       |
| SEN 285       | <i>SEN1 dfm1Δ::KanMX orm1Δ::NatR</i>                                                                     | This study       |

|         |                                                                                                 |            |
|---------|-------------------------------------------------------------------------------------------------|------------|
|         |                                                                                                 |            |
| SEN 291 | <i>SEN1 dfm1Δ::KanMX orm2Δ::NatR</i>                                                            | This study |
| SEN 280 | <i>BY4741 orm1Δ::KanMX</i>                                                                      | This study |
| SEN 281 | <i>BY4741 orm2Δ::KanMX</i>                                                                      | This study |
| SEN 369 | <i>BY4741 orm1Δ::KanMX orm2Δ::LEU2</i>                                                          | This study |
| SEN 282 | <i>BY4741 Lcb2-DaMP</i>                                                                         | This study |
| SEN 266 | <i>BY4741 dfm1Δ::KanMX Lcb2-DaMP</i>                                                            | This study |
| SEN 392 | <i>SEN1 sac1Δ::NatR</i>                                                                         | This study |
| SEN 301 | <i>SEN1 dfm1Δ::KanMX sac1Δ::NatR</i>                                                            | This study |
| SEN 599 | <i>SEN1 CEN::URA3:: prORM2-RFP</i>                                                              | This study |
| SEN 659 | <i>SEN1 dfm1Δ::KanMX CEN::URA3:: prORM2-RFP</i>                                                 | This study |
| SEN 615 | <i>SEN1 der1Δ::KanMX CEN::URA3:: prORM2-RFP</i>                                                 | This study |
| SEN 623 | <i>SEN1 dfm1Δ::KanMX CEN::URA3:: prORM2-RFP<br/>CEN::LEU2:: prDFM1-3xHA</i>                     | This study |
| SEN 624 | <i>SEN1 dfm1Δ::KanMX CEN::URA3:: prORM2-RFP<br/>CEN::LEU2</i>                                   | This study |
| SEN 625 | <i>SEN1 dfm1Δ::KanMX CEN::URA3:: prORM2-RFP<br/>CEN::LEU2:: prDER1-SHP1</i>                     | This study |
| SEN 629 | <i>SEN1 dfm1Δ::KanMX CEN::URA3:: prORM2-RFP<br/>CEN::LEU2:: prDFM1-5Ashp</i>                    | This study |
| SEN 626 | <i>SEN1 dfm1Δ::KanMX CEN::URA3:: prORM2-RFP<br/>CEN::LEU2:: prDFM1-Ax3G</i>                     | This study |
| SEN 628 | <i>SEN1 dfm1Δ::KanMX CEN::URA3:: prORM2-RFP<br/>CEN::LEU2:: prDFM1-AR</i>                       | This study |
| SEN 635 | <i>SEN1 dfm1Δ::KanMX CEN::URA3:: prORM2-RFP<br/>CEN::LEU2:: prDFM1-F58S</i>                     | This study |
| SEN 632 | <i>SEN1 dfm1Δ::KanMX CEN::URA3:: prORM2-RFP<br/>CEN::LEU2:: prDFM1-L64V</i>                     | This study |
| SEN 634 | <i>SEN1 dfm1Δ::KanMX CEN::URA3:: prORM2-RFP<br/>CEN::LEU2:: prDFM1-K67E</i>                     | This study |
| SEN 630 | <i>SEN1 dfm1Δ::KanMX CEN::URA3:: prORM2-RFP<br/>CEN::LEU2:: prDFM1-R98L, S99V, S100V, Q101L</i> | This study |
| SEN 598 | <i>SEN1 hrd1Δ::KanMX CEN::URA3:: prORM2-RFP</i>                                                 | This study |

|         |                                                                 |            |
|---------|-----------------------------------------------------------------|------------|
| SEN 604 | <i>SEN1 doa10Δ::NatR CEN::URA3:: prORM2-RFP</i>                 | This study |
| SEN 607 | <i>SEN1 asi1Δ::HphMX CEN::URA3:: prORM2-RFP</i>                 | This study |
| SEN 622 | <i>SEN1 tul1Δ::KanMX CEN::URA3:: prORM2-RFP</i>                 | This study |
| SEN 606 | <i>SEN1 cdc48Δ::cdc48-2::NatR CEN::URA3:: prORM2-RFP</i>        | This study |
| SEN 608 | <i>SEN1 hrd2-1 CEN::URA3:: prORM2-RFP</i>                       | This study |
| SEN 345 | <i>SEN1 hrd3Δ::KanMX</i>                                        | This study |
| SEN 346 | <i>SEN1 tsc3Δ::KanMX hrd3Δ::NatR</i>                            | This study |
| SEN 437 | <i>SEN1 tsc3Δ::KanMX hrd1Δ::NatR</i>                            | This study |
| SEN 3   | <i>SEN1 hrd1Δ::KanMX</i>                                        | This study |
| SEN 652 | <i>SEN1 doa10Δ::HphMx</i>                                       | This study |
| SEN 654 | <i>SEN1 doa10Δ:: HphMx tsc3Δ::KanMX</i>                         | This study |
| SEN 649 | <i>SEN1 der1Δ::NatR</i>                                         | This study |
| SEN 650 | <i>SEN1 der1Δ::NatR tsc3Δ::KanMX</i>                            | This study |
| SEN 521 | <i>BY4741 LCB1-GFP::HIS3</i>                                    | This study |
| SEN 522 | <i>BY4741 LCB2-GFP::HIS3</i>                                    | This study |
| SEN 523 | <i>BY4741 ORM1-GFP::HIS3</i>                                    | This study |
| SEN 524 | <i>BY4741 ORM2-GFP::HIS3</i>                                    | This study |
| SEN 525 | <i>BY4741 SAC1-GFP::HIS3</i>                                    | This study |
| SEN 526 | <i>BY4741 TSC3-GFP::HIS3</i>                                    | This study |
| SEN 527 | <i>BY4741 YPK1-GFP::HIS3</i>                                    | This study |
| SEN 528 | <i>BY4741 TSC10-GFP::HIS3</i>                                   | This study |
| SEN 662 | <i>SEN1 dfm1Δ::KanMX orm1Δ::NatR<br/>CEN::LEU2::prDFM1-3xHA</i> | This study |
| SEN 661 | <i>SEN1 dfm1Δ::KanMX orm1Δ::NatR</i>                            | This study |

|         |                                                                                           |            |
|---------|-------------------------------------------------------------------------------------------|------------|
|         | <i>CEN::LEU2</i>                                                                          |            |
| SEN 675 | <i>SEN1 dfm1Δ::KanMX orm1Δ::NatR</i><br><i>CEN::LEU2::prDER1-SHP</i>                      | This study |
| SEN 676 | <i>SEN1 dfm1Δ::KanMX orm1Δ::NatR</i><br><i>CEN::LEU2::prDFM1-5Ashp</i>                    | This study |
| SEN 677 | <i>SEN1 dfm1Δ::KanMX orm1Δ::NatR</i><br><i>CEN::LEU2::prDFM1-AR</i>                       | This study |
| SEN 678 | <i>SEN1 dfm1Δ::KanMX orm1Δ::NatR</i><br><i>CEN::LEU2::prDFM1-Ax3G</i>                     | This study |
| SEN 665 | <i>SEN1 dfm1Δ::KanMX orm1Δ::NatR</i><br><i>CEN::LEU2::prDFM1-L64V</i>                     | This study |
| SEN 664 | <i>SEN1 dfm1Δ::KanMX orm1Δ::NatR</i><br><i>CEN::LEU2::prDFM1-F58S</i>                     | This study |
| SEN 666 | <i>SEN1 dfm1Δ::KanMX orm1Δ::NatR</i><br><i>CEN::LEU2::prDFM1-K67E</i>                     | This study |
| SEN 667 | <i>SEN1 dfm1Δ::KanMX orm1Δ::NatR</i><br><i>CEN::LEU2::prDFM1-R98L, S99V, S100V, Q101L</i> | This study |
| SEN 552 | <i>SEN1 orm1Δ::NatR</i>                                                                   | This study |
| SEN 551 | <i>SEN1 orm1Δ::NatR hrd1Δ::KanMX</i>                                                      | This study |
| SEN 543 | <i>SEN1 hrd2-1</i>                                                                        | This study |
| SEN 544 | <i>SEN1 cdc48::cdc48-2::NatR</i>                                                          | This study |
| SEN 545 | <i>SEN1 doa10Δ::HphMx</i>                                                                 | This study |
| SEN 546 | <i>SEN1 hrd2-1 orm1Δ::NatR</i>                                                            | This study |
| SEN 547 | <i>SEN1 cdc48::cdc48-2::NatR orm1Δ::KanMx</i>                                             | This study |
| SEN 548 | <i>SEN1 doa10Δ::HphMx orm1Δ::NatR</i>                                                     | This study |
| SEN 671 | <i>SEN1 orm2Δ::KanMX tsc3Δ::NatR</i><br><i>CEN::URA3::prORM2-3R-GFP</i>                   | This study |
| SEN 672 | <i>SEN1 orm2Δ::KanMX tsc3Δ::NatR</i><br><i>CEN::URA3::prORM2-3A-GFP</i>                   | This study |

|         |                                                                                    |            |
|---------|------------------------------------------------------------------------------------|------------|
|         |                                                                                    |            |
| SEN 673 | <i>BY4741 orm2Δ::KanMX<br/>CEN::URA3::prORM2-3R-GFP</i>                            | This study |
| SEN 674 | <i>BY4741 orm2Δ::KanMX<br/>CEN::URA3::prORM2-3A-GFP</i>                            | This study |
| SEN 679 | <i>SEN1 CEN::TRP1::ORM2-RFP CEN::URA3::HDEL-GFP</i>                                | This study |
| SEN 680 | <i>SEN1 dfm1Δ::KanMX CEN::TRP1::ORM2-RFP<br/>CEN::URA3::HDEL-GFP</i>               | This study |
| SEN 681 | <i>SEN1 tul1Δ::KanMX CEN::TRP1::ORM2-RFP<br/>CEN::URA3::HDEL-GFP</i>               | This study |
| SEN 682 | <i>SEN1 tul1Δ::KanMX CEN::TRP1::ORM2-RFP<br/>CEN::URA3::VPS4-GFP</i>               | This study |
| SEN 683 | <i>SEN1 CEN::URA3::ORM2-3R-GFP<br/>CEN::LEU2::HIS3::SEC61-mCherry</i>              | This study |
| SEN 684 | <i>SEN1 CEN::URA3::ORM2-3R-GFP<br/>CEN::TRP1::CHS5-mCherry</i>                     | This study |
| SEN 685 | <i>SEN1 dfm1Δ::KanMX CEN::URA3::ORM2-3R-GFP<br/>CEN::LEU2::HIS3::SEC61-mCherry</i> | This study |
| SEN 686 | <i>SEN1 dfm1Δ::KanMX CEN::URA3::ORM2-3R-GFP<br/>CEN::TRP1::CHS5-mCherry</i>        | This study |
| SEN 687 | <i>SEN1 CEN::URA3::ORM2-3A-GFP<br/>CEN::LEU2::HIS3::SEC61-mCherry</i>              | This study |
| SEN 688 | <i>dfm1Δ::KanMX CEN::URA3::ORM2-3A-GFP<br/>CEN::LEU2::HIS3::SEC61-mCherry</i>      | This study |
| SEN 708 | <i>SEN1 dfm1Δ::KanMX CEN::URA3:: prORM2-GFP<br/>CEN::LEU2:: prDFM1-3xHA</i>        | This study |
| SEN 709 | <i>SEN1 dfm1Δ::KanMX CEN::URA3:: prORM2-3D-GFP<br/>CEN::LEU2:: prDFM1-3xHA</i>     | This study |
| SEN 710 | <i>SEN1 dfm1Δ::KanMX CEN::URA3:: prORM2-3A-GFP<br/>CEN::LEU2:: prDFM1-3xHA</i>     | This study |
| SEN 711 | <i>SEN1 dfm1Δ::KanMX CEN::URA3:: prORM2-GFP<br/>CEN::LEU2</i>                      | This study |
| SEN 712 | <i>SEN1 dfm1Δ::KanMX orm2Δ::NatR CEN::LEU2:: prDFM1-<br/>3xHA</i>                  | This study |
| SEN 713 | <i>BY4741 ORM2-GFP::HIS3 CEN::LEU2:: prDFM1-3xHA</i>                               | This study |
| SEN 714 | <i>BY4741 ORM2-GFP::HIS3 ypk1Δ::KanMX CEN::LEU2::<br/>prDFM1-3xHA</i>              | This study |
| SEN 715 | <i>BY4741 ORM2-GFP::HIS3 npr1Δ::KanMX CEN::LEU2::<br/>prDFM1-3xHA</i>              | This study |
| SEN 716 | <i>BY4741 CEN::LEU2:: prDFM1-3xHA</i>                                              | This study |



**Appendix Table S3. Reagents used in this study. Related to Methods**

| REAGENT or RESOURCE                                  | SOURCE                      | IDENTIFIER                    |
|------------------------------------------------------|-----------------------------|-------------------------------|
| <b>Antibodies</b>                                    |                             |                               |
| Mouse monoclonal anti-GFP                            | Clontech Laboratories, Inc. | Cat#632381; RRID: AB_2313808  |
| Mouse monoclonal anti-HA                             | Thermo Fisher Scientific    | Cat#32-6700; RRID: AB_2533092 |
| Rabbit polyclonal anti-myc                           | Genscript                   | Cat#A00172; RRID: AB_914457   |
| Rabbit polyclonal anti-Cdc48                         | Gift from Randolph Hampton  | Neal et al., 2016             |
| Mouse monoclonal anti-PGK                            | Thermo Fisher Scientific    | Cat#459250; RRID: AB_2569747  |
| Mouse monoclonal anti-Ubiquitin                      | Gift from Richard Gardner   | This study                    |
| Mouse monoclonal anti-FLAG                           | Sigma-Aldrich               | Cat# F3165<br>RRID:AB_259529  |
| Rabbit Polyclonal anti-Sec61                         | Gift from Randolph Hampton  | (Flagg et al., 2021)          |
| Rabbit polyclonal anti-Tul1                          | Gift from Peter Espenshade  | Tong et al., 2014             |
| Rabbit polyclonal anti-Dsc2                          | Gift from Peter Espenshade  | Tong et al., 2014             |
| Rabbit polyclonal anti-Orm1                          | Gift from Teresa Dunn       | Gable et al., 2000            |
| Rabbit polyclonal anti-Lcb1                          | Gift from Teresa Dunn       | Gable et al., 2000            |
| Rabbit polyclonal anti-Lcb2                          | Gift from Teresa Dunn       | Gable et al., 2000            |
| <b>Bacterial Strain</b>                              |                             |                               |
| <i>Escherichia coli</i> DH5 alpha Competent Cells    | Thermo Fisher Scientific    | Cat#18265017                  |
|                                                      |                             |                               |
|                                                      |                             |                               |
|                                                      |                             |                               |
|                                                      |                             |                               |
|                                                      |                             |                               |
|                                                      |                             |                               |
|                                                      |                             |                               |
| <b>Chemicals, Peptides, and Recombinant Proteins</b> |                             |                               |
| MG132 (benzyloxycarbonyl-Leu-Leu-aldehyde)           | Sigma-Aldrich               | 474787; CAS: 133407-82-6      |
| Cycloheximide                                        | Sigma-Aldrich               | C7698; CAS: 66-819            |
| Protein A Sepharose                                  | GE Healthcare               | 17-0780-01                    |
| GFP-Trap Agarose                                     | ChromoTek                   | RRID: AB_2631357              |
| RFP-Trap Agarose                                     | ChromoTek                   | RRID: AB_2631362              |
| Anti-HA Agarose                                      | Thermo Fisher Scientific    | Cat# 26181                    |
| Streptavidin C1 Dynabeads™ MyOne™                    | Thermo Fisher Scientific    | Cat# 65001                    |
| n-Dodecyl β-D-maltoside                              | Sigma-Aldrich               | Cat# D4641                    |
|                                                      |                             |                               |

| <b>Primers for gene knockout</b>                                   |  | <b>Primer name:</b> |
|--------------------------------------------------------------------|--|---------------------|
| ATGACCGAATTAGATTATCAAGGAACTGCT<br>GACATGGAGGCCCGAGAATACCCTCCTTGAC  |  | ORM1 For            |
| TCAACTAATTTGGGCGCGACCTGTGATACC<br>CAGTATAGCGACCAGCATTACATACGATT    |  | ORM1 Rev            |
| ATGATTGACCGCACTAAAAACGAATCTCCA<br>GACATGGAGGCCCGAGAATACCCTCCTTGAC  |  | ORM2 For            |
| TTAATCTCTTTTTAAAGGATCCGGCTTGGA<br>CAGTATAGCGACCAGCATTACATACGATT    |  | ORM2 Rev            |
| ATGGCACACATCCCAGAGGTTTTACCCAAA<br>GACATGGAGGCCCGAGAATACCCTCCTTGAC  |  | LCB1 For            |
| TTATTTATTAGATTCTTGGCAACAGGCAAG<br>CAGTATAGCGACCAGCATTACATACGATT    |  | LCB1 Rev            |
| ATGACACAACATAAAAGCTCGATGGTGTAC<br>GACATGGAGGCCCGAGAATACCCTCCTTGAC  |  | TSC3 For            |
| AAGGAAGCAATACTTTAGTATACCGAAGAA<br>CAGTATAGCGACCAGCATTACATACGATT    |  | TSC3 Rev            |
| ATGGATGTTGATTCTGACGTTAATGTCTC<br>GACATGGAGGCCCGAGAATACCCTCCTTGAC   |  | DOA10 For           |
| TTAACTTTCATCTGGTAAATTTTCTAAAGC<br>CAGTATAGCGACCAGCATTACATACGATT    |  | DOA10 Rev           |
| ATGGTGCCAGAAAATAGAAGGAAACAGTTG<br>GACATGGAGGCCCGAGAATACCCTCCTTGAC  |  | HRD1 For            |
| CTAGATATGCTGGATAAATTTATCTGGTAT<br>CAGTATAGCGACCAGCATTACATACGATT    |  | HRD Rev             |
| ATGATAACACTCTTATTATACCTGTGCGTA<br>GACATGGAGGCCCGAGAATACCCTCCTTGAC  |  | HRD3 For            |
| TCATATGGCGAATATCTGAACATTGAAGTC<br>CAGTATAGCGACCAGCATTACATACGATT    |  | HRD3 Rev            |
| ATGGATGCTGTAATACTGAATCTCTTAGGC<br>GACATGGAGGCCCGAGAATACCCTCCTTGAC  |  | DER1 For            |
| TTAGGGTGTTCAGTGTTGCGGAACAGTC<br>CAGTATAGCGACCAGCATTACATACGATT      |  | DER1 Rev            |
| ATGTATTCTTGGAAGTCAAAGTTTAAGTTT<br>GACATGGAGGCCCGAGAATACCCTCCTTGAC  |  | YPK1 For            |
| CTATCTAATGCTTCTACCTTGCACCATTGA<br>CAGTATAGCGACCAGCATTACATACGATT    |  | YPK1 Rev            |
| ATGTCTTCATTAACCTCGATTGCTACAGGAA<br>GACATGGAGGCCCGAGAATACCCTCCTTGAC |  | NPR1 For            |
| TTATTGATTATTTTGTCTTTTCTTTTTCTT<br>CAGTATAGCGACCAGCATT              |  | NPR1 Rev            |
