# Supplementary material for: An ERAD‐independent role for rhomboid pseudoprotease Dfm1 in mediating sphingolipid homeostasis
Source: PubMed Central journal article supplement (PMC9929635; doi:10.15252/embj.2022112275), 2022-11-09
Supplement: EMBJ-42-e112275-s002.pdf [file EMBJ-42-e112275-s002.pdf]

## Expanded View Figures

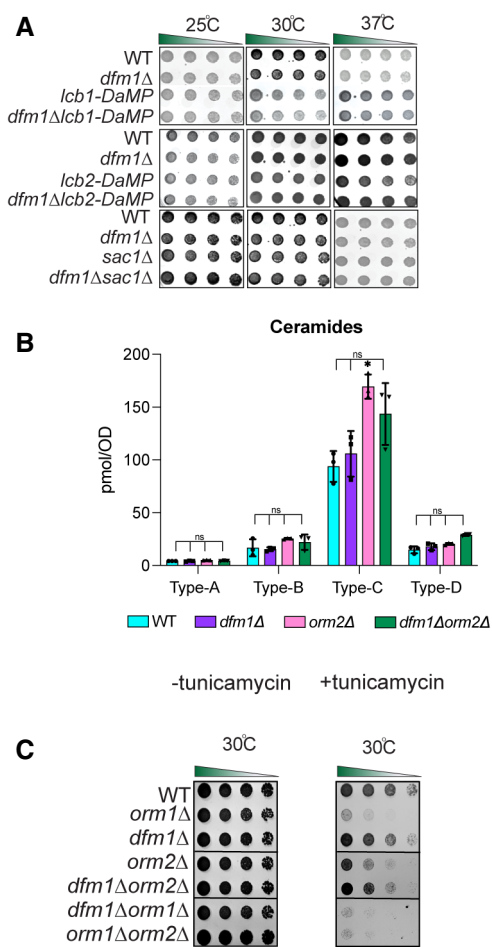

**Figure EV1. Dfm1 does not genetically interact with Lcb1, Lcb2, and Sac1. Related to Fig 3.**

- A** Indicated strains were spotted fivefold dilutions on SC plates in triplicates, and plates were incubated at room temperature, 30°C, and 37°C (3 biological replicates, 2 technical replicates;  $n = 3$ ). *Upper panel*: WT, *dfm1*Δ, *Lcb1*-DaMP, and *dfm1*Δ*Lcb1*-DaMP were compared for growth by dilution assay. *Middle panel*: WT, *dfm1*Δ, *Lcb2*-DaMP, and *dfm1*Δ*Lcb2*-DaMP were compared for growth by dilution assay. *Bottom panel*: WT, *dfm1*Δ, and *dfm1*Δ *sac1*Δ were compared for growth by dilution assay.
- B** WT, *dfm1*Δ, *orm2*Δ, and *orm2*Δ*dfm1*Δ cells were grown to log phase at 30°C and lipids were extracted and subjected to LC-MS/MS. A-, B-, C-, and D-type ceramides containing C16, C18, C20, C22, C24, and C26 fatty acids were measured (3 biological replicates;  $n = 3$ ). Values represent the means  $\pm$  S.E.M. Statistically significant differences compared to WT cells are indicated (pairwise Dunnett's test followed by Bonferroni's *post hoc* analysis; ns, non-significant,  $*P < 0.05$ ).
- C** Serial dilution growth was performed on YPD plates in the presence or absence of 1  $\mu$ g/ml tunicamycin using WT, *orm1*Δ, *orm2*Δ, *dfm1*Δ, *dfm1*Δ*orm1*Δ, *orm1*Δ*orm2*Δ, and *dfm1*Δ*orm2*Δ cells (3 biological replicates, 2 technical replicates;  $n = 3$ ).

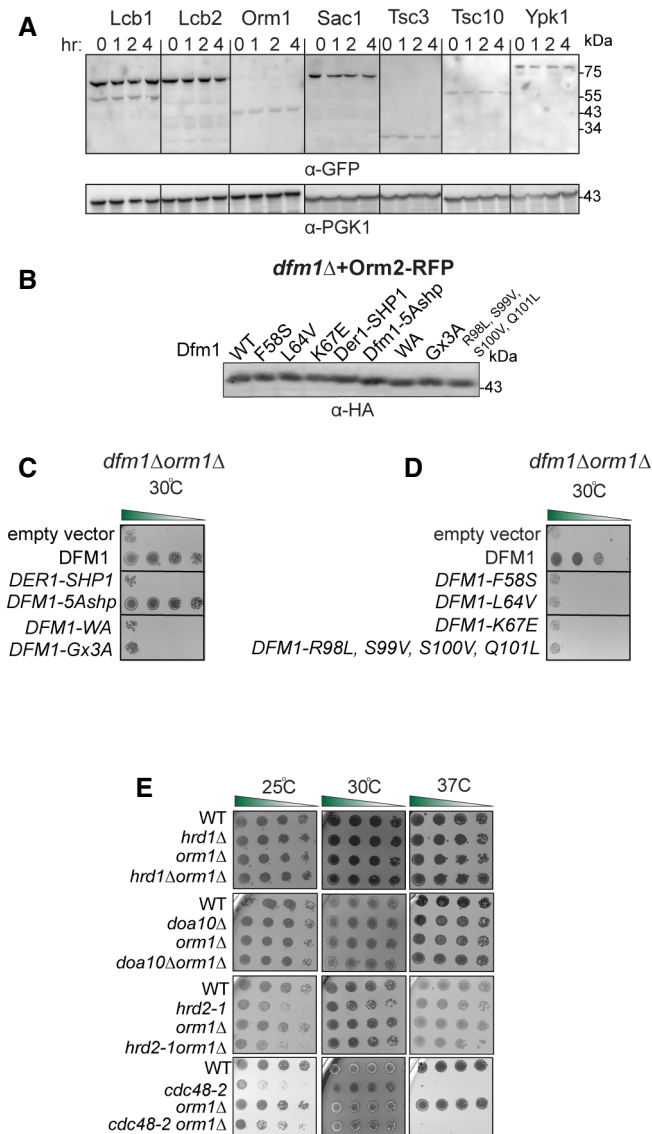

**Figure EV2. Orm2 is degraded in WT strains. Related to Fig 5.**

- A In the indicated WT strains, degradation of Lcb1-GFP, Lcb2-GFP, Orm2-GFP, Orm1-GFP, Sac1-GFP, Tsc3-GFP, Tsc10-GFP, and Ypk1-GFP was measured by CHX-chase assay (3 biological replicates;  $n = 3$ ). Cells were analyzed by SDS-PAGE and immunoblotted with  $\alpha$ -GFP.
- B Steady-state levels of Dfm1 and corresponding Dfm1 mutants. Cells were analyzed by SDS-PAGE and immunoblotted with  $\alpha$ -HA.
- C Serial dilution growth assay was performed on *dfm1Δorm1Δ* and strains with DFM1, DER1-SHP, DFM1-AA, DFM1-Ax3A, DFM1-5Ashpmtnt, and empty vector add back (3 biological replicates, 2 technical replicates;  $n = 3$ ).
- D Same as (C), except serial dilution growth assay was performed on *dfm1Δorm1Δ* strains with L1 mutant add back: F58S, L64V, K67E, and TMD2 quad mutant add back: DFM1-R98L, S99V, S100V, and Q101L. Indicated strains were grown on SC-Leu plates at room temperature, 30°C, and 37°C, and imaged on Day 2 and Day 7 (3 biological replicates, 2 technical replicates;  $n = 3$ ).
- E ERAD mutants do not genetically interact with *orm1Δ*. Indicated strains were spotted fivefold dilutions on SC plates in triplicate, and plates were incubated at room temperature, 30°C, and 37°C (3 biological replicates, 2 technical replicates;  $n = 3$ ).

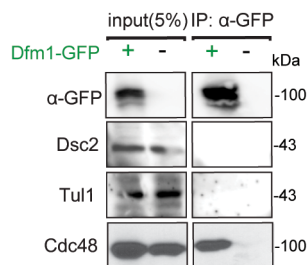

**Figure EV3. Dfm1 does not interact with EGAD components. Related to Fig 6.**

Dfm1-GFP binding to EGAD members, Dsc2 and Tul1, were analyzed by co-IP. As a negative control, cells not expressing Dfm1-GFP were used (2 biological replicates;  $n = 2$ ).

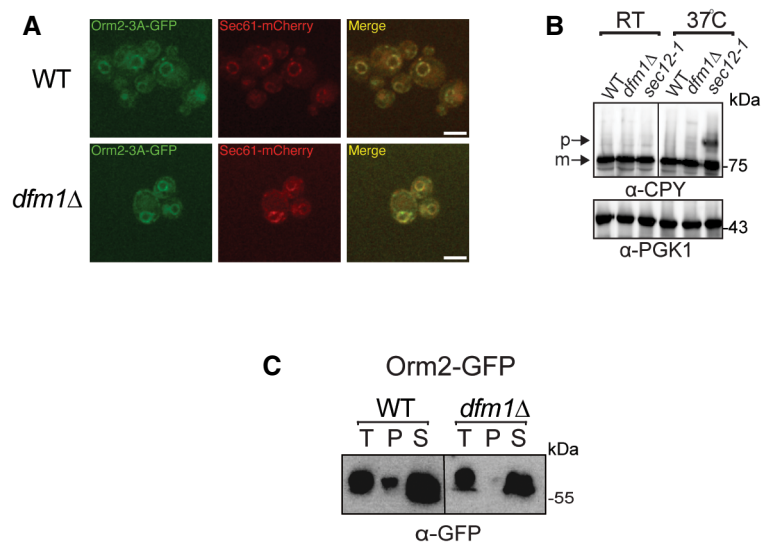

**Figure EV4. Orm2-3A accumulates exclusively in the ER. Related to Fig 7.**

- A Fluorescence imaging was performed as in Fig 7B except for WT and *dfm1*Δ cells expressing Orm2-3A-GFP was used. Sec61-RFP (ER marker, red) was used to test for co-localization with Orm2-3A-GFP (2 biological replicates;  $n = 2$ ). Arrowheads indicate Orm2 co-localizing in post-ER compartments. Scale bar, 5  $\mu$ m.
- B *dfm1*Δ cells do not abrogate COPII-mediated export of CPY. The indicated cells were either grown at room temperature or shifted to non-permissive growth at 37°C. Cells were analyzed by SDS-PAGE and immunoblotted for CPY with  $\alpha$ -CPY and PGK1 with  $\alpha$ -PGK1.
- C Western blot of aggregated versus soluble Orm2-GFP at the ER. Lysates from WT and *dfm1*Δ cells containing ORM2-GFP were blotted using anti-GFP to detect Orm2. P is ER aggregated fraction and S is ER soluble fraction.
